# Supplementary material for: 3D printed nickel catalytic static mixers made by corrosive chemical treatment for use in continuous flow hydrogenation
Source: Royal Society of Chemistry journal article supplement (doi:10.1039/d1re00456e), 2021-11-15
Supplement: d1re00456e1.pdf [file d1re00456e1.pdf]

## Supporting Information

### Title: 3D printed nickel catalytic static mixers made by corrosive chemical treatment for use in continuous flow hydrogenation

Milan Kundra,<sup>a</sup> Yutong Zhu,<sup>a</sup> Xuan Nguyen,<sup>a</sup> Darren Fraser,<sup>a</sup> Christian H. Hornung\*,<sup>a</sup> and John Tsanaktsidis<sup>a</sup>

\*christian.hornung@csiro.au

<sup>a</sup>) CSIRO Manufacturing, Bag 10, Clayton South, Victoria 3169, Australia.

### XPS results - elemental composition of leached Monel samples:

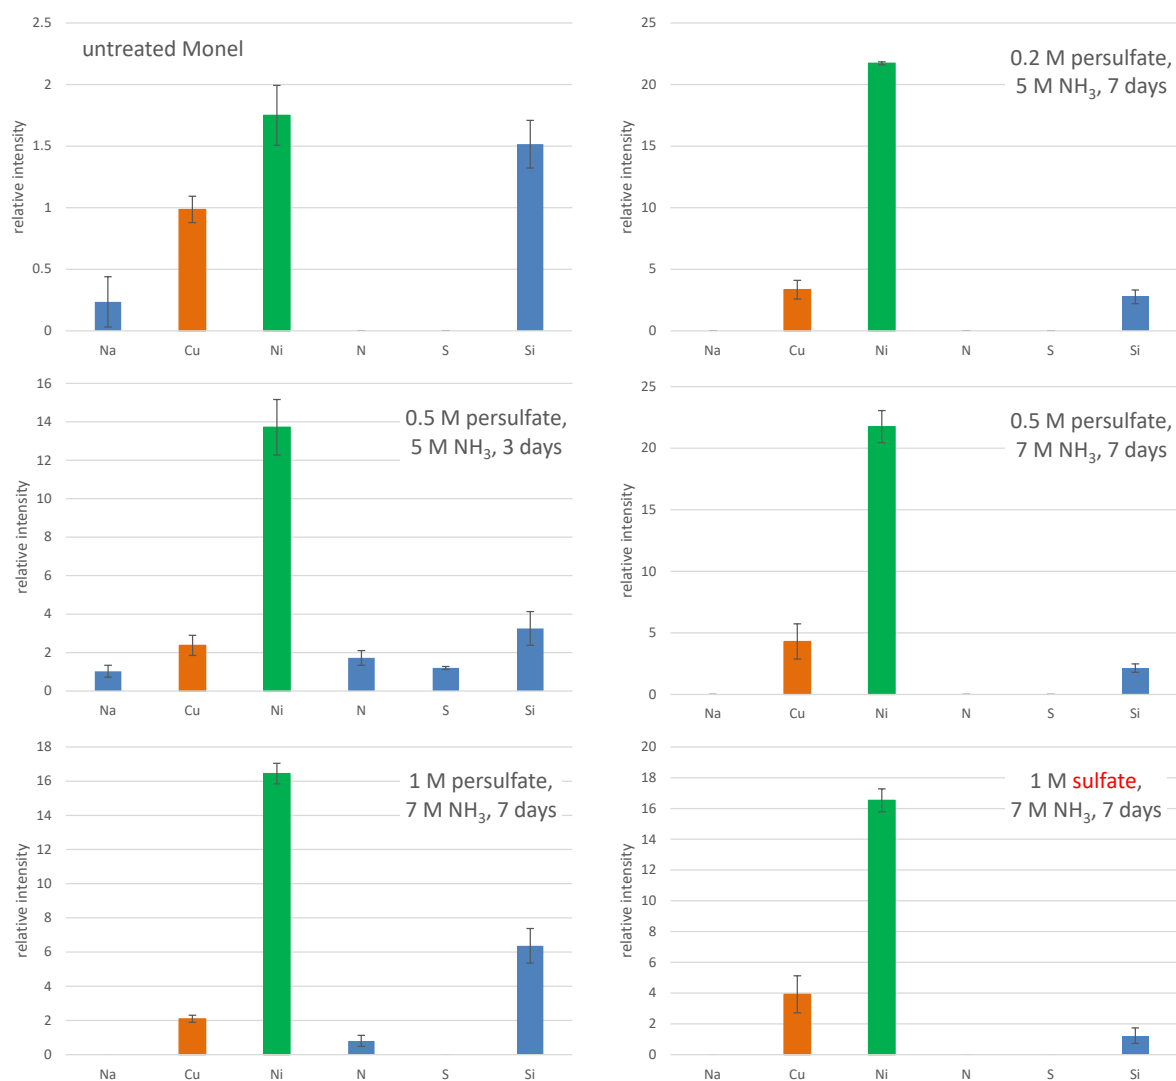

**Figure S1.** Elemental composition of leached Monel samples, determined by XPS for different leaching solutions and conditions.

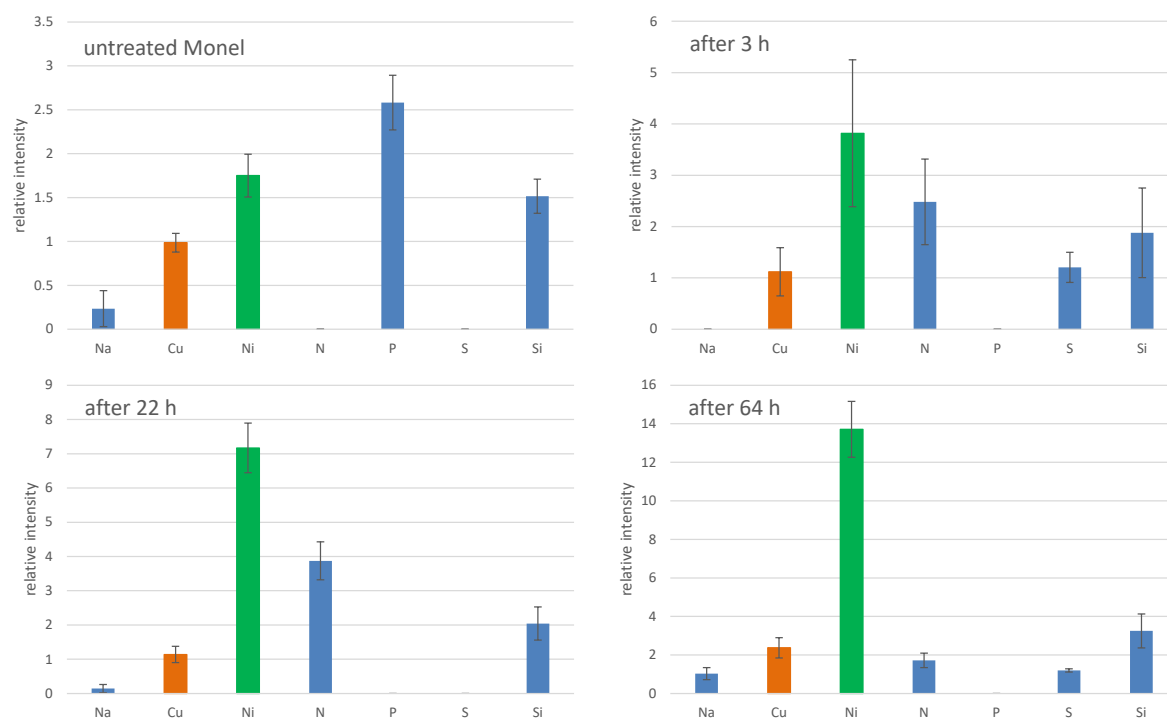

**Figure S2.** Elemental composition of leached Monel samples, determined by XPS for different leaching times.
